# Supplementary material for: Synthesis of K[B3H7NH2BH2NH2B3H7] for a K-ion solid-state electrolyte
Source: Royal Society of Chemistry journal article supplement (doi:10.1039/d2cc00408a), 2022-01-01
Supplement: d2cc00408a1.pdf [file d2cc00408a1.pdf]

## Supporting Information

# Synthesis of $\text{K}[\text{B}_3\text{H}_7\text{NH}_2\text{BH}_2\text{NH}_2\text{B}_3\text{H}_7]$ for K-ion solid-state electrolyte

Xi-Meng Chen,<sup>a</sup> Si-Han Jia,<sup>a</sup> Jia-Xin Kang,<sup>a</sup> Yichun Zhang,<sup>a</sup> Yubin Ma,<sup>a</sup> Yiming Ma,<sup>a</sup>

Xin Jiang,<sup>a</sup> Xing-Chao Yu,<sup>a</sup> Pengtao Qiu,<sup>\*a</sup> and Xuenian Chen<sup>\*a,b</sup>

*<sup>a</sup>School of Chemistry and Chemical Engineering, Henan Key Laboratory of Boron Chemistry and Advanced Energy Materials, Henan Normal University, Xinxiang, Henan 453007, China*

*<sup>b</sup>College of Chemistry, Zhengzhou University, Zhengzhou, Henan 450001, China*

*\*E-mails: [xuenian\\_chen@zzu.edu.cn](mailto:xuenian_chen@zzu.edu.cn); [qiupengtao@htu.edu.cn](mailto:qiupengtao@htu.edu.cn)*

## 1. Experimental section:

**1.1. General procedures.** All manipulations were carried out on a Schlenk line or in a glove box filled with high-purity nitrogen. The  $^{11}\text{B}$  NMR and  $^{11}\text{B}\{^1\text{H}\}$  NMR spectra were recorded at 193 MHz spectrometer and externally referenced to  $\text{BF}_3\cdot\text{OEt}_2$  in  $\text{C}_6\text{D}_6$  ( $\delta = 0.00$  ppm). The  $^1\text{H}$  NMR and  $^1\text{H}\{^{11}\text{B}\}$  NMR spectra were obtained at 600 MHz spectrometer. IR spectra were measured by a Spectrum 400F. Elemental analyses were carried out on an Elementar (Vario EL) instrument. The thermal behaviours of compounds were determined by synchronous thermal analyses (TGA-DSC and TGA-MS, Netzsch 449 C Jupiter/QMS 403D).

Single-crystal X-ray diffraction analysis of compound was recorded on an Agilent SuperNova Dual diffractometer using graphite monochromated  $\text{Cu K}\alpha$  radiation,  $\lambda = 1.54184$  Å. The crystal data and selected bond distances of  $\text{K}[\text{B}_3\text{H}_7\text{NH}_2\text{BH}_2\text{NH}_2\text{B}_3\text{H}_7]\cdot 18\text{-crown-6}$  were summarized in Tables S1 and S2. Further details on the crystal structure investigation can be obtained free of charge from The Cambridge Crystallographic Data Centre *via* [www.ccdc.cam.ac.uk/data\\_request/cif](http://www.ccdc.cam.ac.uk/data_request/cif) on quoting the depository number CCDC-2122765.

KH was washed with tetrahydrofuran (THF) and n-hexane and then dried in vacuo.  $\text{KNH}_2\text{BH}_3$  and  $\text{NH}_3\text{B}_3\text{H}_7$  were prepared according to the literature methods.<sup>1,2</sup> All of the solvents were distilled from standard drying agents and degassed before use.

**1.2. Synthesis of  $\text{K}[\text{B}_3\text{H}_7\text{NH}_2\text{BH}_2\text{NH}_2\text{B}_3\text{H}_7]$  through the reaction of KH with  $\text{NH}_3\text{B}_3\text{H}_7$ .**  $\text{NH}_3\text{B}_3\text{H}_7$  (0.17 g, 3.0 mmol) and KH (0.08 g, 2.0 mmol) were added to a 50 mL Schlenk flask. The flask was connected with a Schlenk line, and 15 mL THF was injected. Then, the reaction solution was stirred at  $-40$  °C for 1 hour (Fig. S1), and a white precipitate was formed (Fig. S2). After filtration, THF was removed from the filtrate under dynamic vacuum to leave a white powder. The residue was washed with  $\text{CH}_2\text{Cl}_2$  ( $3 \times 20$  mL), and then dried under vacuum. 15 mL THF was injected to the flask, and then 2 mL n-hexane was dropped into the THF solution until a small amount of white precipitate was appeared. After filtration, THF and n-hexane were removed from the filtrate under dynamic vacuum to leave a white powder product  $\text{K}[\text{B}_3\text{H}_7\text{NH}_2\text{BH}_2\text{NH}_2\text{B}_3\text{H}_7]$  (0.14 g, 86% yield).  $^{11}\text{B}$  NMR (193 MHz,  $\text{CD}_3\text{CN}$ ):  $\delta -8.55$

(*t*,  $J = 103.8$  Hz,  $BH_2$ ),  $-17.11$  (*br*, 4 B of 2  $BHB$  in 2  $B_3H_7$ ),  $-25.48$  (*br*, 2 B of 2  $BH_2$  in 2  $B_3H_7$ ) ppm (Fig. 1a).  $^{11}B\{^1H\}$  NMR (193 MHz,  $CD_3CN$ ):  $\delta -8.55$  (*s*,  $BH_2$ ),  $-17.11$  (*s*, 4 B of 2  $BHB$  in 2  $B_3H_7$ ),  $-25.48$  (*s*, 2 B of 2  $BH_2$  in 2  $B_3H_7$ ) ppm (Fig. 1b).  $^1H$  NMR (600 MHz,  $CD_3CN$ )  $\delta 2.32$  (*br*, 4 H of 2  $NH_2$ ),  $1.86$  (*m*, 2 H of  $BH_2$ ),  $1.05$  (*br*, 14 H of 2  $B_3H_7$ ) ppm (Fig. S3a).  $^1H\{^{11}B\}$  NMR (600 MHz,  $CD_3CN$ )  $\delta 2.32$  (*br*, 4 H of 2  $NH_2$ ),  $1.86$  (*m*, 2 H of  $BH_2$ ),  $1.06$  (*s*, 14 H of 2  $B_3H_7$ ) ppm (Fig. S3b). IR ( $cm^{-1}$ ): 3313 (*s*), 3270 (*s*), 2480 (*s*), 2432 (*s*), 2279 (*m*), 2209 (*w*), 1540 (*s*), 1380 (*w*), 1206 (*s*), 1164 (*s*), 1116(*s*), 1053 (*s*), 949(*s*), 900(*s*), 691(*w*) (Fig. S4). Anal. Calcd for  $K[B_3H_7NH_2BH_2NH_2B_3H_7]$ : H, 12.37; N, 17.19. Found: H, 12.03; N, 17.35.

**1.3. Synthesis of  $K[B_3H_7NH_2BH_2NH_2B_3H_7]$  through the reaction of  $K[NH_2BH_3]$  with  $NH_3B_3H_7$ .**  $NH_3B_3H_7$  (0.17 g, 3.0 mmol) and  $K[NH_2BH_3]$  (0.14 g, 2.0 mmol) were added to a 50 mL Schlenk flask. The flask was connected with a Schlenk line and 15 mL THF was injected. The reaction solution was stirred at room temperature for 24 hours (Fig. S15), and a white precipitate was formed (Fig. S16 and S17). After filtration, THF was removed from the filtrate under dynamic vacuum to leave a white powder. The residue was washed with  $CH_2Cl_2$  ( $3 \times 20$  mL), and then dried under vacuum to yield a white powder product  $K[B_3H_7NH_2BH_2NH_2B_3H_7]$  (0.12 g, 74% yield).  $^{11}B$  NMR (193 MHz,  $CD_3CN$ ):  $\delta -8.58$  (*t*,  $J = 103.8$  Hz,  $BH_2$ ),  $-17.10$  (*br*, 4 B of 2  $BHB$  in 2  $B_3H_7$ ),  $-25.54$  (*br*, 2 B of 2  $BH_2$  in 2  $B_3H_7$ ) ppm (Fig. S5a).  $^{11}B\{^1H\}$  NMR (193 MHz,  $CD_3CN$ ):  $\delta -8.58$  (*s*,  $BH_2$ ),  $-17.06$  (*s*, 4 B of 2  $BHB$  in 2  $B_3H_7$ ),  $-25.47$  (*s*, 2 B of 2  $BH_2$  in 2  $B_3H_7$ ) ppm (Fig. S5b).  $^1H$  NMR (600 MHz,  $CD_3CN$ )  $\delta 2.31$  (*br*, 4 H of 2  $NH_2$ ),  $1.87$  (*m*, 2 H of  $BH_2$ ),  $1.08$  (*br*, 14 H of 2  $B_3H_7$ ) ppm (Fig. S6a).  $^1H\{^{11}B\}$  NMR (600 MHz,  $CD_3CN$ )  $\delta 2.32$  (*br*, 4 H of 2  $NH_2$ ),  $1.86$  (*m*, 2H of  $BH_2$ ),  $1.05$  (*s*, 14 H of 2  $B_3H_7$ ) ppm (Fig. S6b).

**1.4. Electrochemical measurement.** Electrochemical impedance spectroscopy (EIS) was used for the ionic conductivity. The as-synthesized compounds were pressed into pellets with 6.35 mm diameter in glove box. And the thickness of the pellets was measured by a calibrated Mitutoyo digital caliper. All EIS measurements utilized a homemade airtight cell, in which stainless use steel (SUS) was used as electrode. The EIS spectra from 1 Hz to  $10^5$  Hz with a 10 mv AC signal were collected by an Autolab

AUT88031 potentiostat after maintaining the cell for 30 min at a given temperature. Ionic conductivity ( $\sigma$ , S cm<sup>-1</sup>) was calculated by the equation  $\sigma = d/(R \times A)$ , where  $R$  ( $\Omega$ ),  $A$  (cm<sup>2</sup>), and  $d$  (cm) are electrolyte resistance, effective contact area between electrolyte and electrode, and thickness of the electrolyte, respectively. The activation energies ( $E_a$ ) were evaluated by Arrhenius equation  $\sigma T = A_0 \exp(-E_a/kT)$ , where  $A_0$  and  $k$  are pre-exponential factor and Boltzmann constant, respectively. Linear sweep voltammetry (LSV) from open circuit voltage (OCV) to 4 V and -0.05 V (vs K<sup>+</sup>/K) at a scan rate of 0.1 mV s<sup>-1</sup> in a K/electrolyte/SUS cell were measured for the electrochemical stability window. The direct current (DC) through the K/electrolyte/K cells in the voltage of 50 mV and the resistances before and after polarization of electrolyte were recorded for the K-ion transference number ( $t_K^+$ ), which was calculated by the equation  $t_K^+ = I_s (\Delta V - I_0 R_0) / I_0 (\Delta V - I_s R_s)$ , where  $\Delta V$  (V),  $I_0$  (A),  $R_0$  ( $\Omega$ ),  $I_s$  (A), and  $R_s$  ( $\Omega$ ) are DC polarization potential, the initial current, the resistance before polarization, the steady current, and the resistance after polarization, respectively. Galvanostatic cycling data of a K/electrolyte/K cell were recorded at a constant current density of 0.01 mA cm<sup>-2</sup> with a cycling interval of 1h at 45 °C on a multichannel battery testing system (LAND CT3001A) for the compatibility with K metal.

**1.5. Computational details.** The geometry optimization was performed Gaussian 09 software at B3LYP-D3(BJ)/6-311G(d,p) level.<sup>3</sup> The structures were obtained from the single-crystal data, and only the position of hydrogen atoms was optimized. The ESP was analyzed by Multiwfn code and rendered by VMD.<sup>4,5</sup>

## 2. Supporting results:

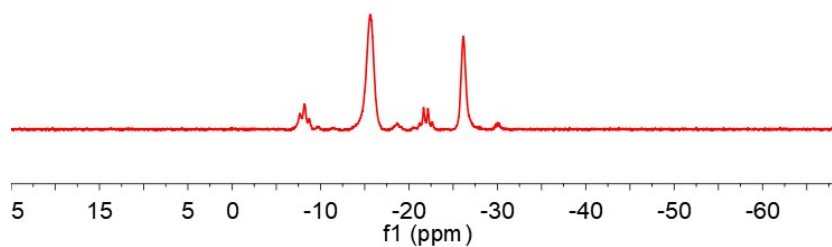

**Fig. S1** The  $^{11}\text{B}$  NMR spectrum of the reaction solution of KH with  $\text{NH}_3\text{B}_3\text{H}_7$  in THF.

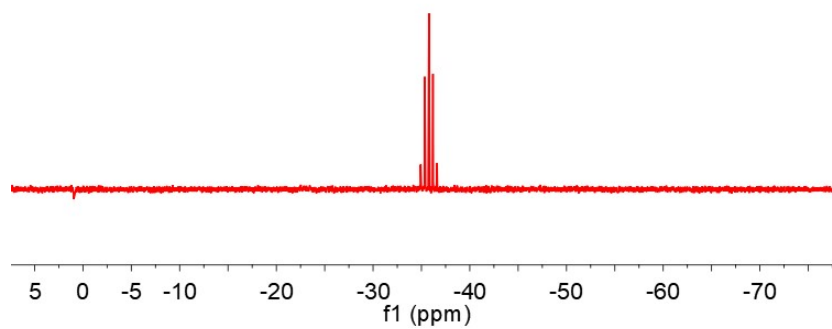

**Fig. S2** The  $^{11}\text{B}$  NMR spectrum of  $\text{KBH}_4$  formed in the reaction of KH with  $\text{NH}_3\text{B}_3\text{H}_7$  in DMSO.

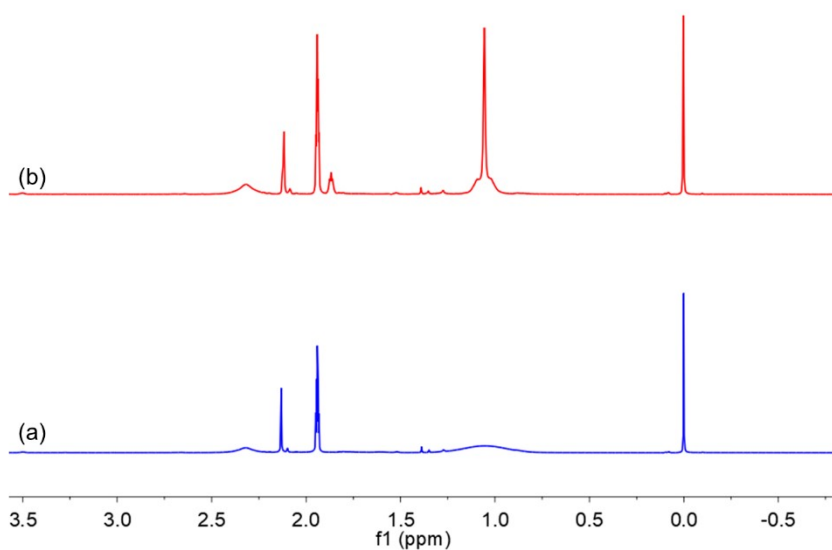

**Fig. S3** The  $^1\text{H}$  NMR (a) and  $^1\text{H}\{^{11}\text{B}\}$  NMR (b) spectra of  $\text{K}[\text{B}_3\text{H}_7\text{NH}_2\text{BH}_2\text{NH}_2\text{B}_3\text{H}_7]$  in  $\text{CD}_3\text{CN}$ , which was isolated from the reaction of  $\text{KH}$  with  $\text{NH}_3\text{B}_3\text{H}_7$ .

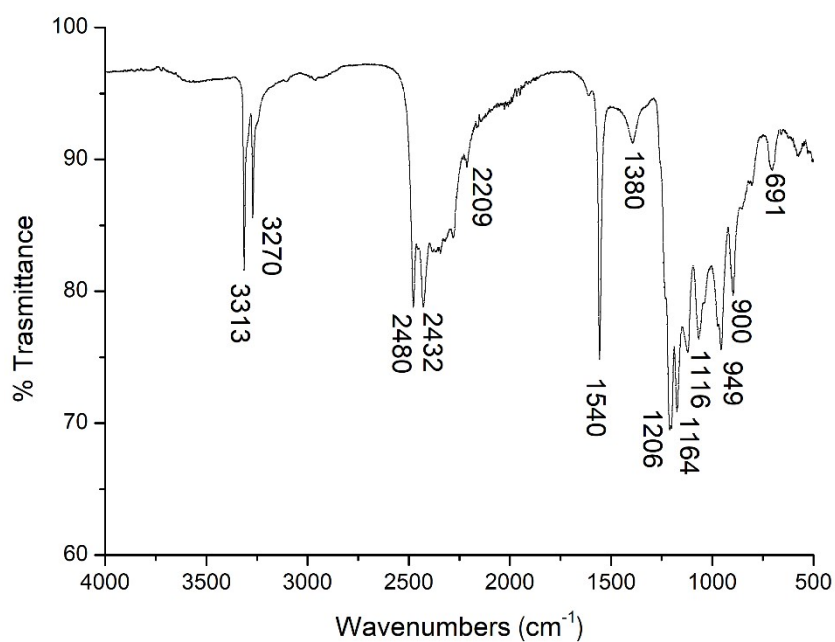

**Fig. S4** The IR spectrum of  $\text{K}[\text{B}_3\text{H}_7\text{NH}_2\text{BH}_2\text{NH}_2\text{B}_3\text{H}_7]$ , which was isolated from the reaction of  $\text{KH}$  with  $\text{NH}_3\text{B}_3\text{H}_7$ .

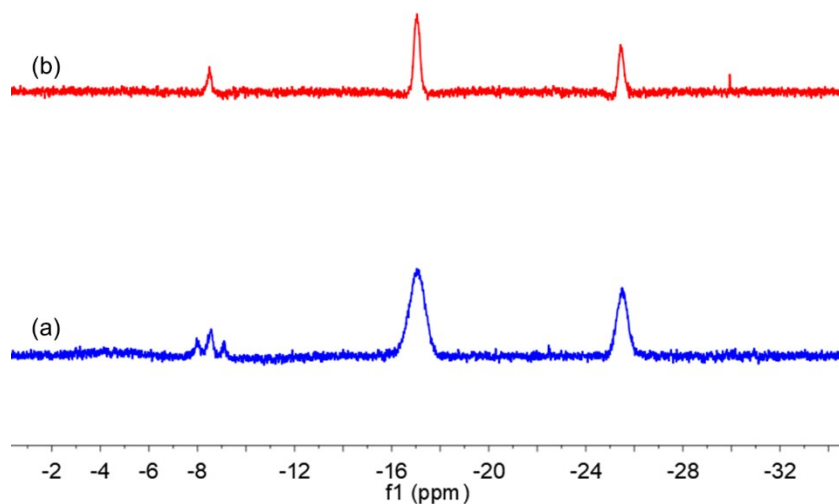

**Fig. S5** The  $^{11}\text{B}$  NMR (a) and  $^{11}\text{B}\{^1\text{H}\}$  NMR (b) spectra of  $\text{K}[\text{B}_3\text{H}_7\text{NH}_2\text{BH}_2\text{NH}_2\text{B}_3\text{H}_7]$  in  $\text{CD}_3\text{CN}$ , which was isolated from the reaction of  $\text{K}[\text{NH}_2\text{BH}_3]$  with  $\text{NH}_3\text{B}_3\text{H}_7$ .

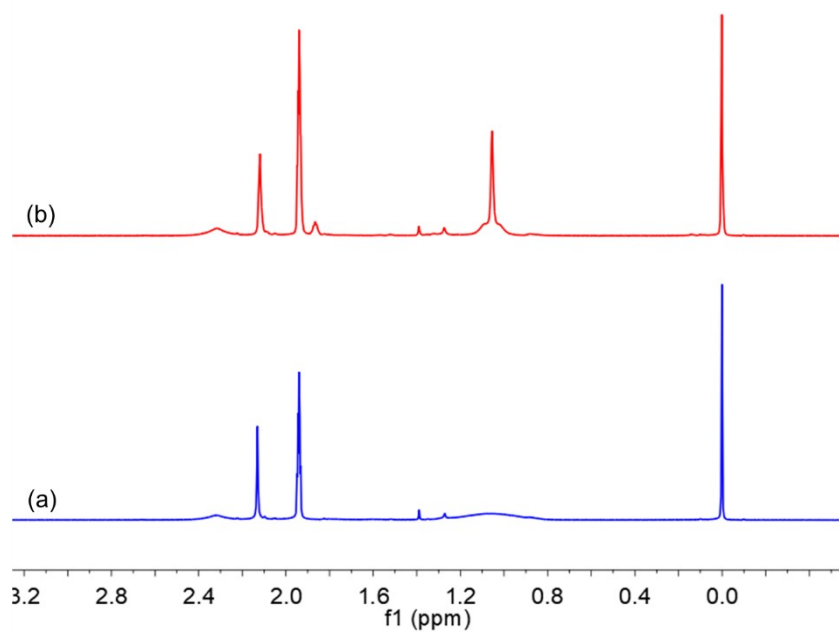

**Fig. S6** The  $^1\text{H}$  NMR (a) and  $^1\text{H}\{^{11}\text{B}\}$  NMR (b) spectra of  $\text{K}[\text{B}_3\text{H}_7\text{NH}_2\text{BH}_2\text{NH}_2\text{B}_3\text{H}_7]$  in  $\text{CD}_3\text{CN}$ , which was isolated from the reaction of  $\text{K}[\text{NH}_2\text{BH}_3]$  with  $\text{NH}_3\text{B}_3\text{H}_7$ .

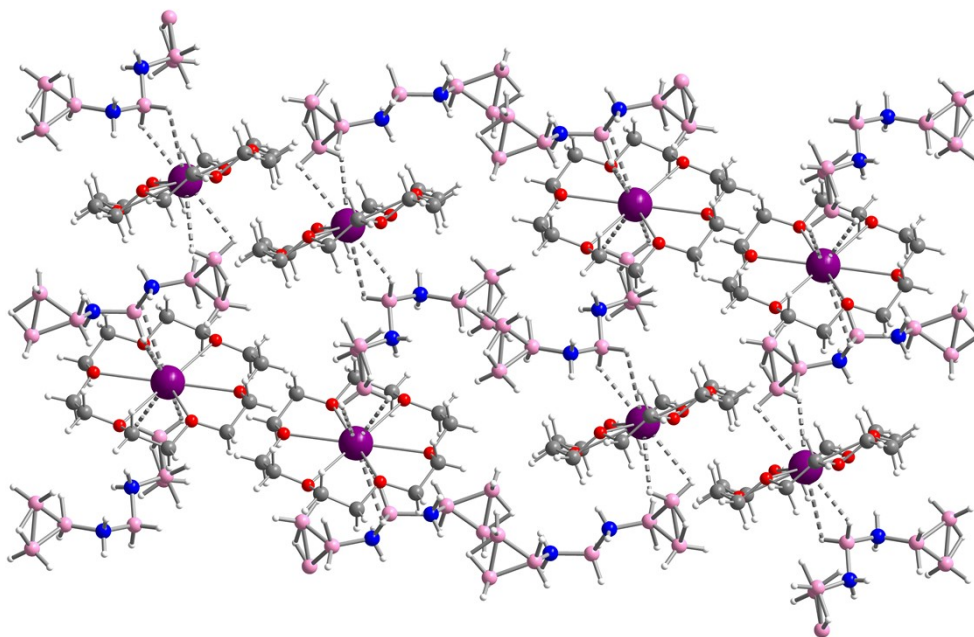

**Fig. S7** Single-crystal structure of  $\text{K}[\text{B}_3\text{H}_7\text{NH}_2\text{BH}_2\text{NH}_2\text{B}_3\text{H}_7] \cdot 18\text{-crown-6}$  adduct.  
 Colors: N, blue; B, pink; O, red; H, white; C, gray; K, purple.

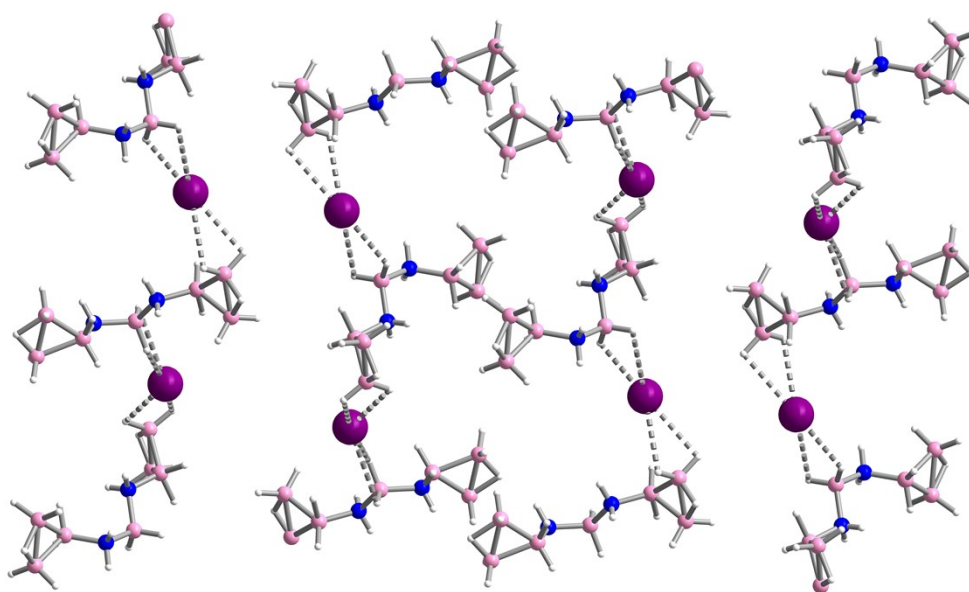

**Fig. S8** Single-crystal structure of the  $\text{K}[\text{B}_3\text{H}_7\text{NH}_2\text{BH}_2\text{NH}_2\text{B}_3\text{H}_7]$  fragment of  $\text{K}[\text{B}_3\text{H}_7\text{NH}_2\text{BH}_2\text{NH}_2\text{B}_3\text{H}_7] \cdot 18\text{-crown-6}$  adduct. Colors: N, blue; B, pink; H, white; K, purple.



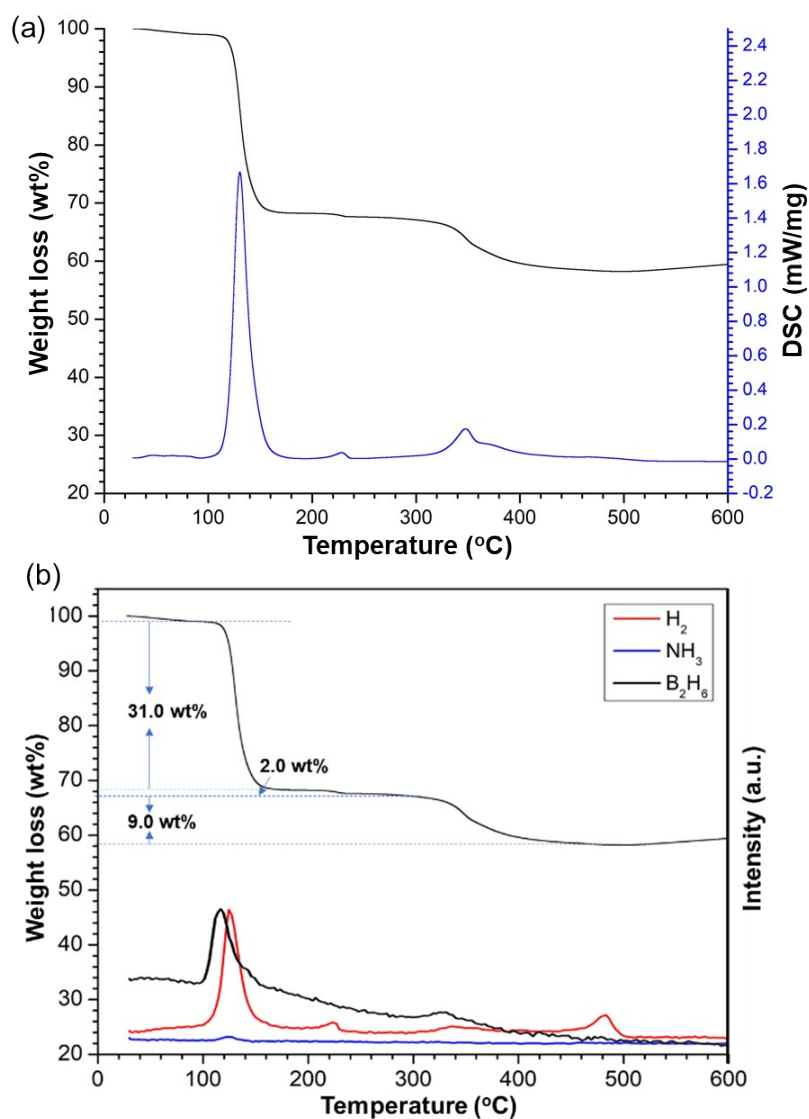

**Fig. S9** The TGA-DSC (a) and TGA-MS (b) spectra of the prepared  $K[B_3H_7NH_2BH_2NH_2B_3H_7]$  (5  $^{\circ}C/min$ ,  $N_2$ ).

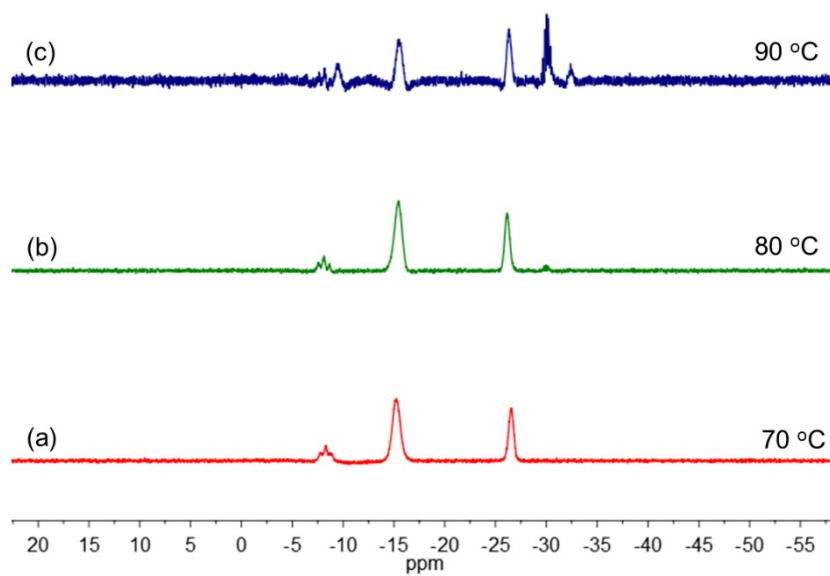

**Fig. S10**  $^{11}\text{B}$  NMR spectra of  $\text{K}[\text{B}_3\text{H}_7\text{NH}_2\text{BH}_2\text{NH}_2\text{B}_3\text{H}_7]$  recorded after heating to a given temperature.

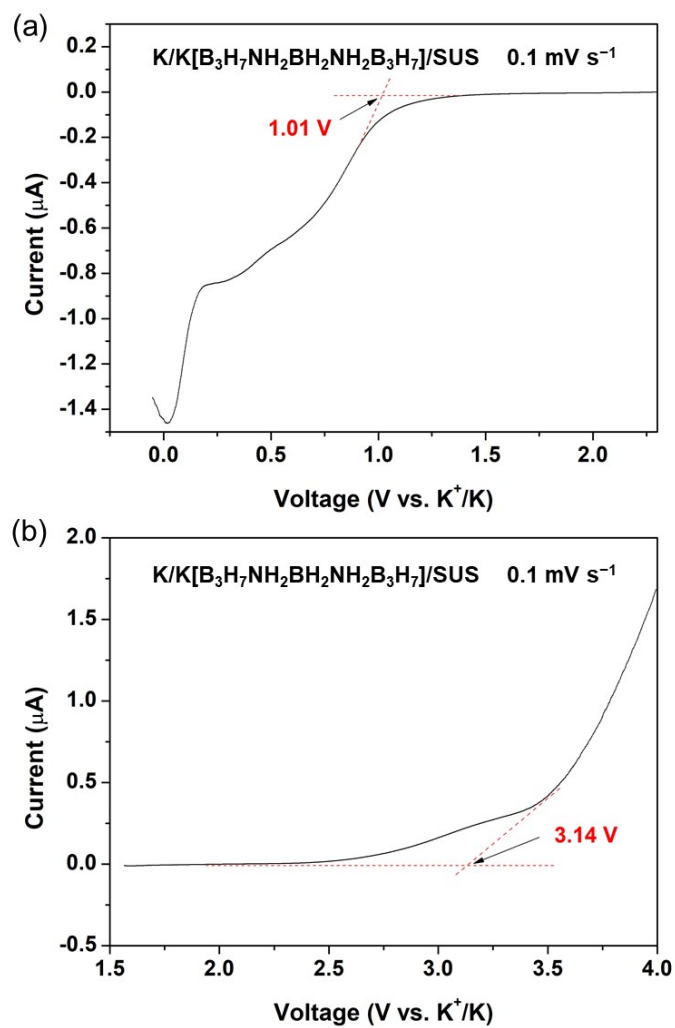

**Fig. S11** LSV curves of  $\text{K}[\text{K}[\text{B}_3\text{H}_7\text{NH}_2\text{BH}_2\text{NH}_2\text{B}_3\text{H}_7]]/\text{SUS}$  at scan ranges of OCV to  $-0.05\text{ V (K}^+/\text{K)}$  (a) and OCV to  $4.0\text{ V (K}^+/\text{K)}$  (b).

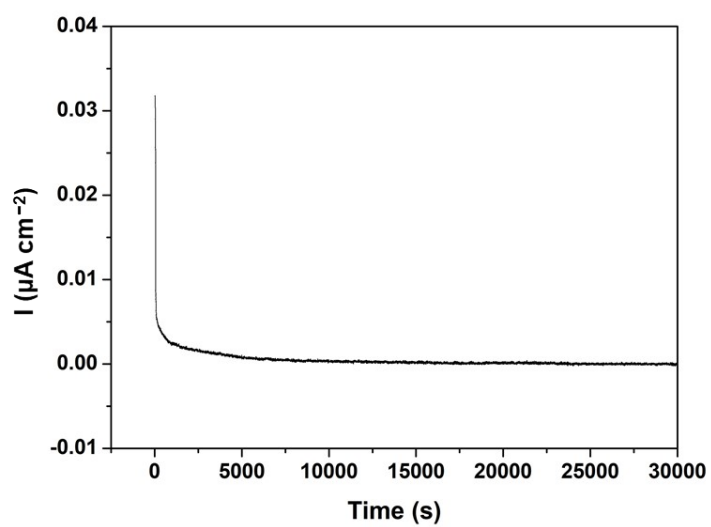

**Fig. S12** DC polarization curve of a  $\text{SUS}/\text{K}[\text{B}_3\text{H}_7\text{NH}_2\text{BH}_2\text{NH}_2\text{B}_3\text{H}_7]/\text{SUS}$  cell.

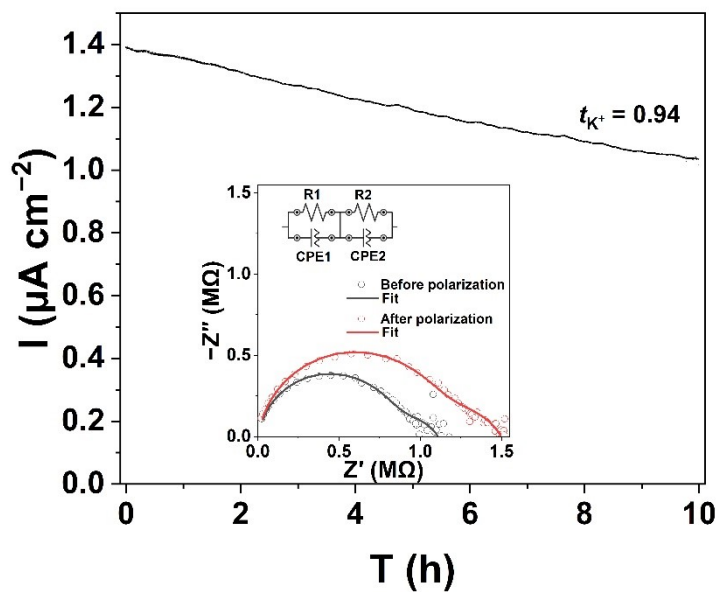

**Fig. S13** DC polarization curve of a  $\text{K}/\text{K}[\text{B}_3\text{H}_7\text{NH}_2\text{BH}_2\text{NH}_2\text{B}_3\text{H}_7]/\text{K}$  cell. Inset is the EIS spectra of the cell before and after polarization.

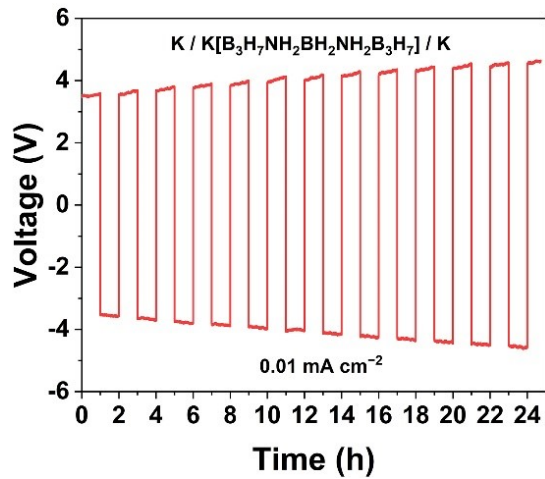

**Fig. S14** Galvanostatic cycling of a  $\text{K}/\text{K}[\text{B}_3\text{H}_7\text{NH}_2\text{BH}_2\text{NH}_2\text{B}_3\text{H}_7]/\text{K}$  cell at a constant current density of  $0.01 \text{ mA cm}^{-2}$ . Temperature:  $45 \text{ }^\circ\text{C}$ .

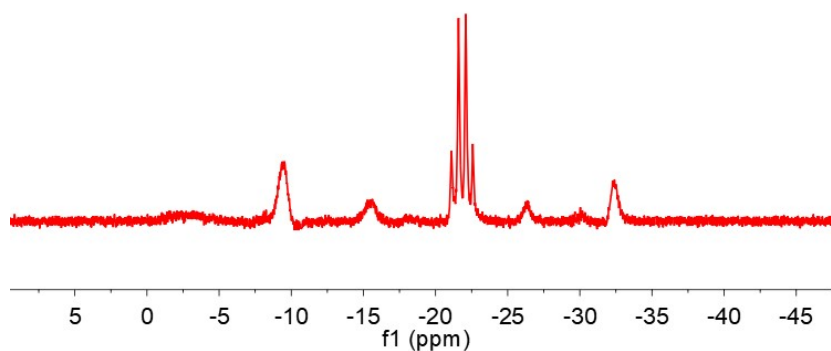

**Fig. S15** The  $^{11}\text{B}$  NMR spectrum of the reaction solution of  $\text{K}[\text{NH}_2\text{BH}_3]$  with  $\text{NH}_3\text{B}_3\text{H}_7$  in THF.

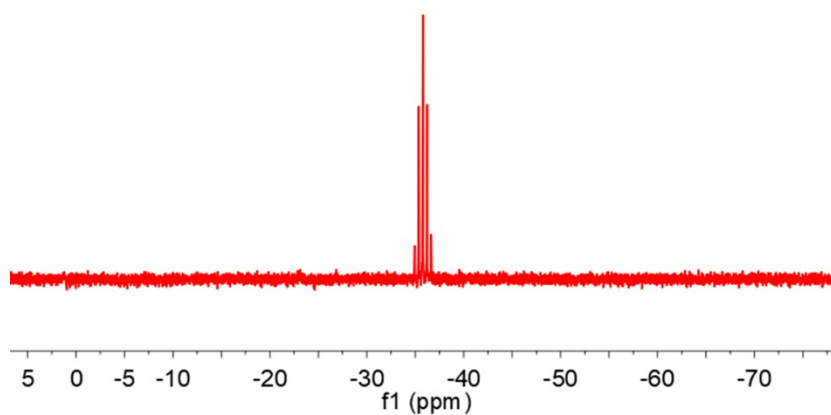

**Fig. S16** The  $^{11}\text{B}$  NMR spectrum of  $\text{KBH}_4$  formed in the reaction of  $\text{K}[\text{NH}_2\text{BH}_3]$  with  $\text{NH}_3\text{B}_3\text{H}_7$  in DMSO.

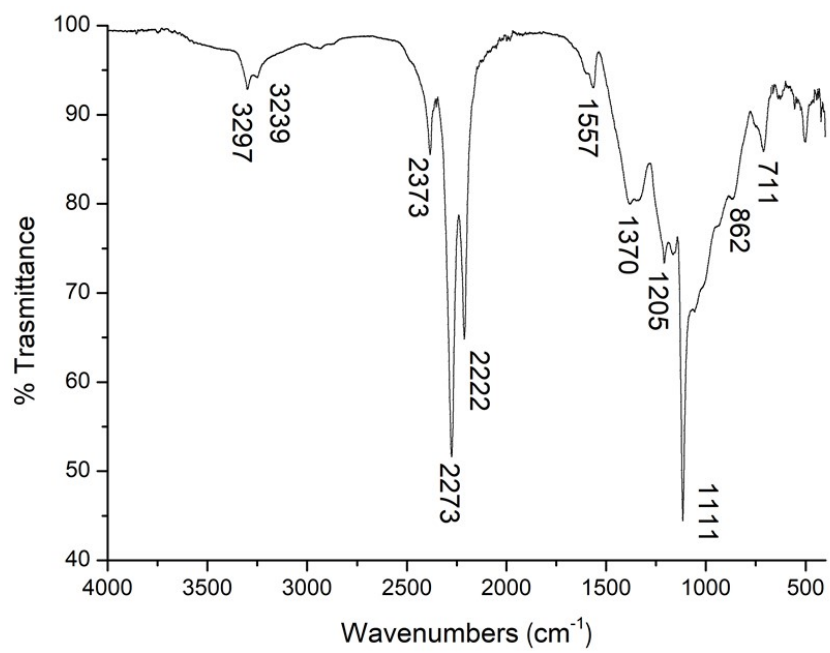

**Fig. S17** The IR spectrum of  $[\text{NH}_2\text{BH}_2]_n$  formed in the reaction of  $\text{K}[\text{NH}_2\text{BH}_3]$  with  $\text{NH}_3\text{B}_3\text{H}_7$ .

### 3. Tables:

**Table S1** Experimental and crystallographic details for  
 $\text{K}[\text{B}_3\text{H}_7\text{NH}_2\text{BH}_2\text{NH}_2\text{B}_3\text{H}_7]$

|                                   |                                                                                      |
|-----------------------------------|--------------------------------------------------------------------------------------|
| Formula sum                       | $\text{C}_{24}\text{H}_{88}\text{B}_{14}\text{K}_2\text{N}_4\text{O}_{12}$           |
| Formula weight                    | 854.52                                                                               |
| Wavelength                        | 1.54184 Å                                                                            |
| Crystal system                    | monoclinic                                                                           |
| Space group                       | I2/c                                                                                 |
| Cell parameters                   | a = 16.5487(3) Å<br>b = 9.1479(2) Å<br>c = 34.5522(7) Å<br>$\beta = 95.294(2)^\circ$ |
| Cell volume                       | 5208.40(18) Å <sup>3</sup>                                                           |
| Z                                 | 4                                                                                    |
| Calc. density                     | 1.090 g/cm <sup>3</sup>                                                              |
| Absorption coefficient            | 1.992 mm <sup>-1</sup>                                                               |
| F (000)                           | 1856.0                                                                               |
| Crystal size                      | 0.02×0.02×0.02 mm <sup>3</sup>                                                       |
| Theta range for data collection   | 10.006 to 142.996°                                                                   |
| Index ranges                      | -20≤h≤20, -7≤k≤11, -41≤l≤42                                                          |
| Reflections collected             | 10316                                                                                |
| Independent reflections           | 4924 [R(int)= 0.0573, R(sigma)= 0.0662]                                              |
| Data/restraints/parameters        | 4924/1/341                                                                           |
| Goodness-of-fit on F <sup>2</sup> | 1.079                                                                                |
| Final R indexes [I>=2σ (I)]       | R <sub>1</sub> = 0.0577, wR <sub>2</sub> = 0.1484                                    |
| Final R indexes [all data]        | R <sub>1</sub> = 0.0755, wR <sub>2</sub> = 0.1581                                    |
| Measured temperature              | 149.99(10) K                                                                         |
| Largest diff. peak and hole       | 0.53 and -0.56 e/ Å <sup>3</sup>                                                     |

**Table S2** Selected bond distances (Å) for crystal structure

| Distances (Å) |            |         |            |
|---------------|------------|---------|------------|
| B5-B7         | 1.827(4)   | O2-C2   | 1.419(4)   |
| B5-B6         | 1.796(4)   | O2-C3   | 1.424(3)   |
| B3-B2         | 1.751(4)   | C5-C6   | 1.498(5)   |
| B3-B1         | 1.814(4)   | C7-C8   | 1.499(4)   |
| B7-B6         | 1.732(4)   | C9-C10  | 1.486(4)   |
| B2-B1         | 1.764(4)   | C11-C12 | 1.490(4)   |
| K1-B1         | 3.257(3)   | C1-C2   | 1.493(4)   |
| N2-B5         | 1.569(3)   | C3-C4   | 1.482(5)   |
| N2-B4         | 1.579(3)   | O4-C6   | 1.414(3)   |
| N1-B4         | 1.577(3)   | O4-C7   | 1.419(3)   |
| N1-B3         | 1.573(3)   | O1-C12  | 1.425(3)   |
| O3-C5         | 1.418(3)   | O1-C1   | 1.420(3)   |
| O3-C4         | 1.427(3)   | K1-O1   | 2.7634(17) |
| O5-C8         | 1.427(3)   | K1-O3   | 2.8043(17) |
| O5-C9         | 1.426(3)   | K1-O5   | 2.8403(15) |
| O6-C10        | 1.423(3)   | K1-O6   | 2.8666(15) |
| O6-C11        | 1.425(3)   | K1-O2   | 2.7870(16) |
| K1-O4         | 2.8247(17) |         |            |



#### 4. References:

- 1 X.-M. Chen, Y. Jing, J.-X. Kang, Y. Wang, Y. Guo and X. Chen, *Inorg. Chem.*, 2021, **60**, 18466–18472.
- 2 H. V. K. Diyabalanage, T. Nakagawa, R. P. Shrestha, T. A. Semelsberger, B. L. Davis, B. Scott, A. K. Burrell, W. I. F. David, K. R. Ryan, M. O. Jones and P. P. Edwards, *J. Am. Chem. Soc.*, 2010, **132**, 11836–11837.
- 3 M. J. Frisch, G. W. Trucks, H. B. Schlegel, G. E. Scuseria, M. A. Robb, J. R. Cheeseman, G. Scalmani, V. Barone, G. A. Petersson, H. Nakatsuji, X. Li, M. Caricato, A. V. Marenich, J. Bloino, B. G. Janesko, R. Gomperts, B. Mennucci, H. P. Hratchian, J. V. Ortiz, A. F. Izmaylov, J. L. Sonnenberg, D. Williams-Young, F. Ding, F. Lipparini, F. Egidi, J. Goings, B. Peng, A. Petrone, T. Henderson, D. Ranasinghe, V. G. Zakrzewski, J. Gao, N. Rega, G. Zheng, W. Liang, M. Hada, M. Ehara, K. Toyota, R. Fukuda, J. Hasegawa, M. Ishida, T. Nakajima, Y. Honda, O. Kitao, H. Nakai, T. Vreven, K. Throssell, Jr. J. A. Montgomery, J. E. Peralta, F. Ogliaro, M. J. Bearpark, J. J. Heyd, E. N. Brothers, K. N. Kudin, V. N. Staroverov, T. A. Keith, R. Kobayashi, J. Normand, K. Raghavachari, A. P. Rendell, J. C. Burant, S. S. Iyengar, J. Tomasi, M. Cossi, J. M. Millam, M. Klene, C. Adamo, R. Cammi, J. W. Ochterski, R. L. Martin, K. Morokuma, O. Farkas, J. B. Foresman and D. J. Fox, Gaussian 09, Revision D.01, Gaussian, Inc., Wallingford CT, 2016.
- 4 (a) T. Lu, F. Chen, *J. comput. Chem.*, 2012, **33**, 580–592; (b) J. Zhang, T. Lu, *Phys. Chem. Chem. Phys.*, 2021, **23**, 20323–20328.
- 5 W. Humphrey, A. Dalke and K. Schulten, *J. Mol. Graph.*, 1996, **14**, 33–38.
